# Supplementary material for: Delineating the Biosynthesis of Gentamicin X2, the Common Precursor of the Gentamicin C Antibiotic Complex
Source: PubMed Central journal article supplement (PMC4340712; doi:10.1016/j.chembiol.2014.12.012), 2015-02-19
Supplement: mmc1.pdf [file mmc1.pdf]

**Chemistry & Biology, Volume 22**

**Supplemental Information**

**Delineating the Biosynthesis of Gentamicin X2,  
the Common Precursor of the  
Gentamicin C Antibiotic Complex**

**Chuan Huang, Fanglu Huang, Eileen Moison, Junhong Guo, Xinyun Jian,  
Xiaobo Duan, Zixin Deng, Peter F. Leadlay, and Yuhui Sun**

## Supplemental Information

### Inventory of Supplemental Information

**Table S1.** LC-ESI-HRMS analysis of *genD2-genS2-genN-genD1* knock-out mutants. Related to Figure 2.

**Figure S1.** In-frame deletion of *genD2*, *genS2*, *genN* and *genD1* in *M. echinospora* ATCC 15835, and complementation of  $\Delta$ genD2,  $\Delta$ genS2,  $\Delta$ genN,  $\Delta$ genD1,  $\Delta$ genD2 $\Delta$ genK and  $\Delta$ genS2 $\Delta$ genK. Related to Figure 2.

**Figure S2.** MS and MS/MS spectra of gentamicin-related intermediates isolated from mutants of *M. echinospora*. Related to Figure 2.

**Figure S3.** LC-ESI-HRMS analysis of the production of the gentamicin C complex and gentamicin-related intermediates by *Micromonospora echinospora* mutants fed with gentamicin A or G418. Related to Figure 2.

**Figure S4.** Characterization of purified recombinant GenD2, GenS2, GenN and GenD1. Related to Figures 3 and 4.

**Figure S5.** LC-ESI-HRMS analysis of GenD2-, GenS2- and GenN-catalyzed modifications on kanamycin B and tobramycin. Related to Figure 3.

### Supplemental Experimental Procedures

1. List of oligonucleotide primers used in this study
2. List of bacterial strains and plasmids used in this study
3. Structures of 3"-dehydro-3"-amino-gentamicin A2 and its homologs
4. Purification of gentamicin A2
5. Kinetic study of GenN with kanamycin B
6. Conditions for LC-ESI-MS analyses

**Table S1. LC-HRMS analysis of *genD2-genS2-genN-genD1* knock-out mutants**

| Strain                                     | Gentamicin C complex production ( $\times 10^5$ ) |     |      |      |      | Intermediates production ( $\times 10^5$ ) |      |      |     |      |
|--------------------------------------------|---------------------------------------------------|-----|------|------|------|--------------------------------------------|------|------|-----|------|
|                                            | C1a                                               | C2b | C2   | C2a  | C1   | A2                                         | A    | A2e  | X2  | DAA2 |
| wild-type                                  | 12.6                                              | 1.3 | 59.8 | 10.0 | 95.9 | 2.1                                        | 3.4  | ND   | 2.2 | ND   |
| $\Delta$ genD2                             | ND                                                | ND  | ND   | ND   | ND   | 25.6                                       | ND   | 30.3 | ND  | ND   |
| $\Delta$ genS2                             | ND                                                | ND  | ND   | ND   | ND   | 47.4                                       | ND   | 46.5 | ND  | ND   |
| $\Delta$ genD2 $\Delta$ genK               | ND                                                | ND  | ND   | ND   | ND   | 69.1                                       | ND   | ND   | ND  | ND   |
| $\Delta$ genS2 $\Delta$ genK               | ND                                                | ND  | ND   | ND   | ND   | 70.6                                       | ND   | ND   | ND  | ND   |
| $\Delta$ genD2 $\Delta$ genK:: <i>genK</i> | ND                                                | ND  | ND   | ND   | ND   | 27.8                                       | ND   | 42.3 | ND  | ND   |
| $\Delta$ genS2 $\Delta$ genK:: <i>genK</i> | ND                                                | ND  | ND   | ND   | ND   | 27.8                                       | ND   | 36.8 | ND  | ND   |
| $\Delta$ genD1                             | ND                                                | ND  | ND   | ND   | ND   | 13.7                                       | 19.7 | 5.6  | ND  | ND   |
| $\Delta$ genN                              | ND                                                | ND  | ND   | ND   | ND   | 19.1                                       | ND   | 18.1 | ND  | 0.7  |

**ND, not detected**

**Figure S1. In-frame deletion of *genD2*, *genS2*, *genN* and *genD1* in *M. echinospora* ATCC 15835, and complementation of  $\Delta$ *genD2*,  $\Delta$ *genS2*,  $\Delta$ *genN*,  $\Delta$ *genD1*,  $\Delta$ *genD2* $\Delta$ *genK* and  $\Delta$ *genS2* $\Delta$ *genK*. Related to Figure 2.**

Schematic representation of the in-frame deletions and complementations, and Southern blot confirmations are shown for each mutant. The arrows indicate the expected size of the fragments from the wild-type and mutants chromosomal DNA, respectively.

**A.  $\Delta$ *genD2***

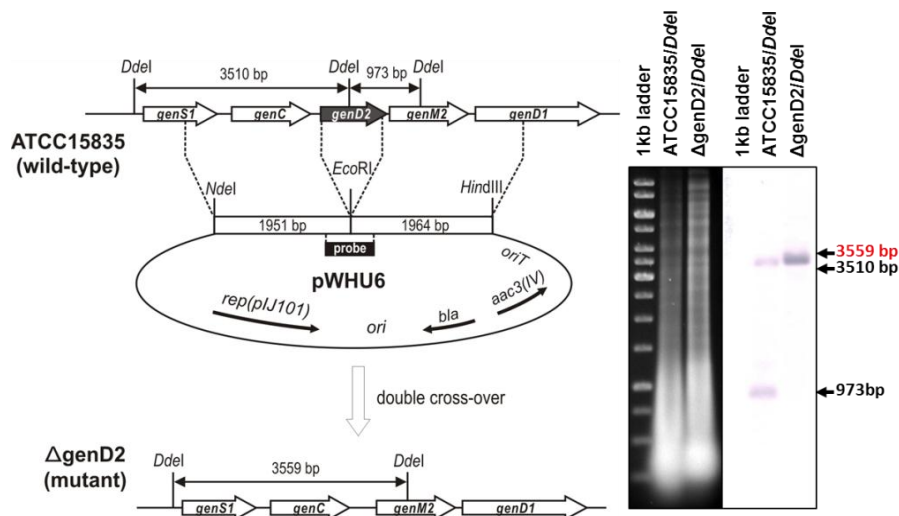

**B.  $\Delta$ *genS2***

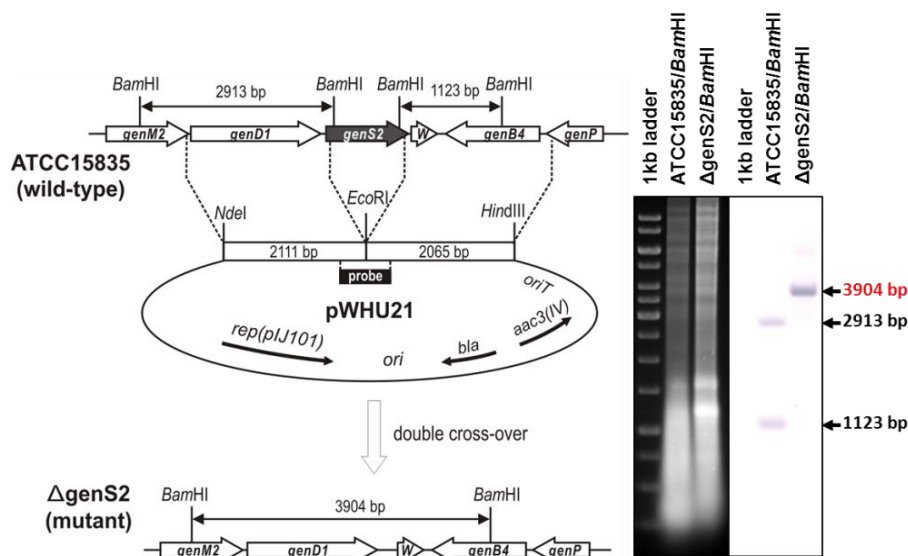

### C. $\Delta$ genD2 $\Delta$ genK

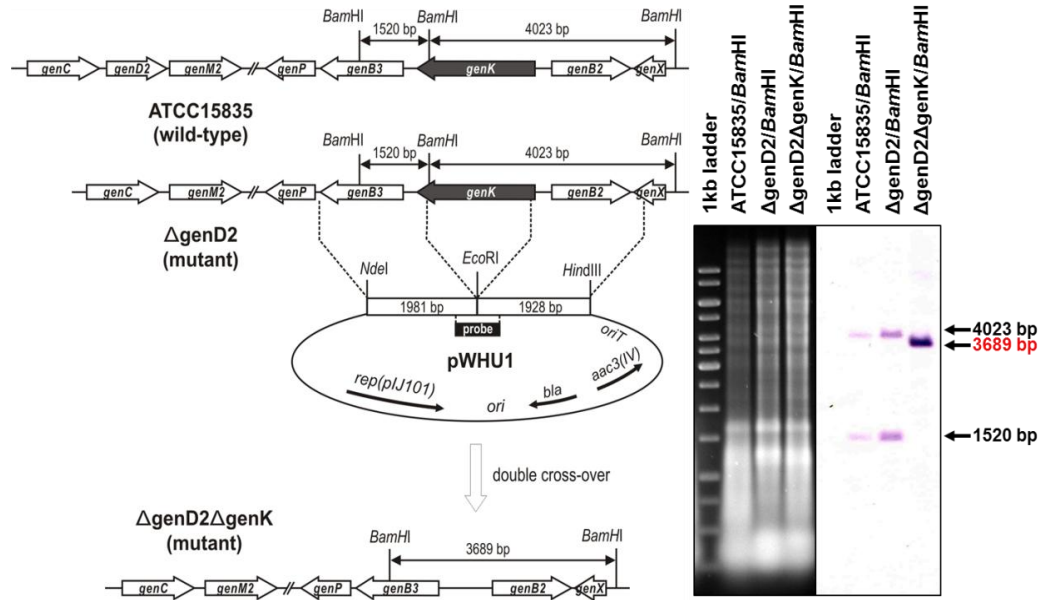

### D. $\Delta$ genS2 $\Delta$ genK

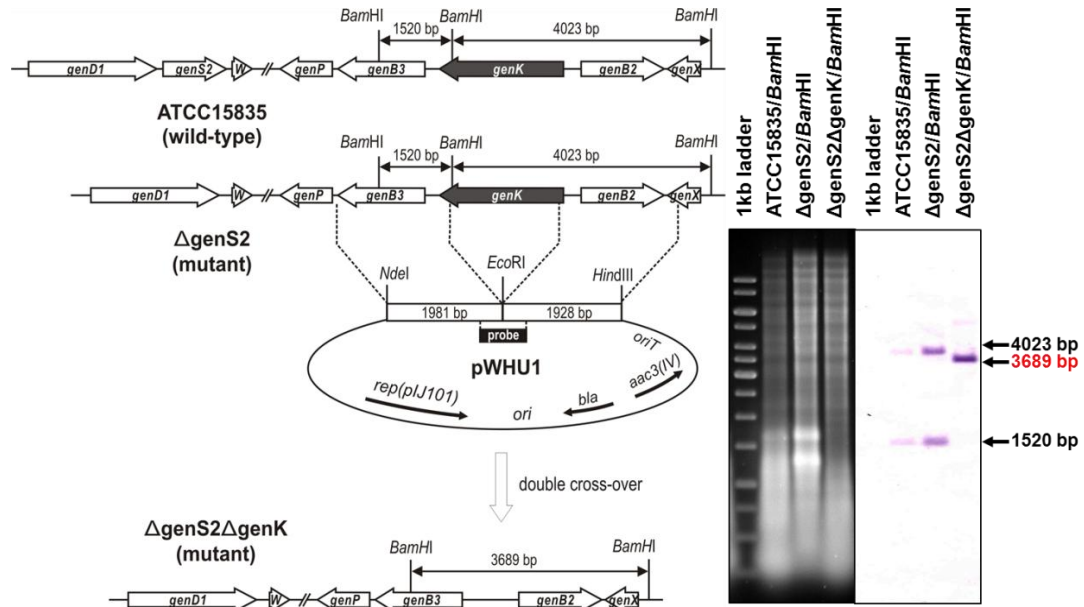

### E. $\Delta$ genN

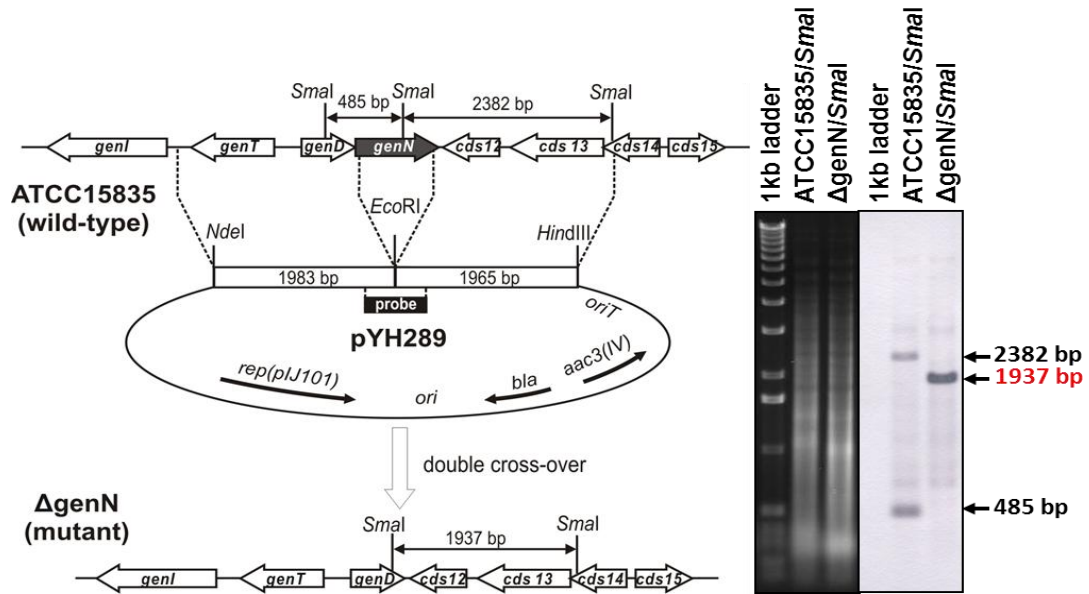

### F. $\Delta$ genD1

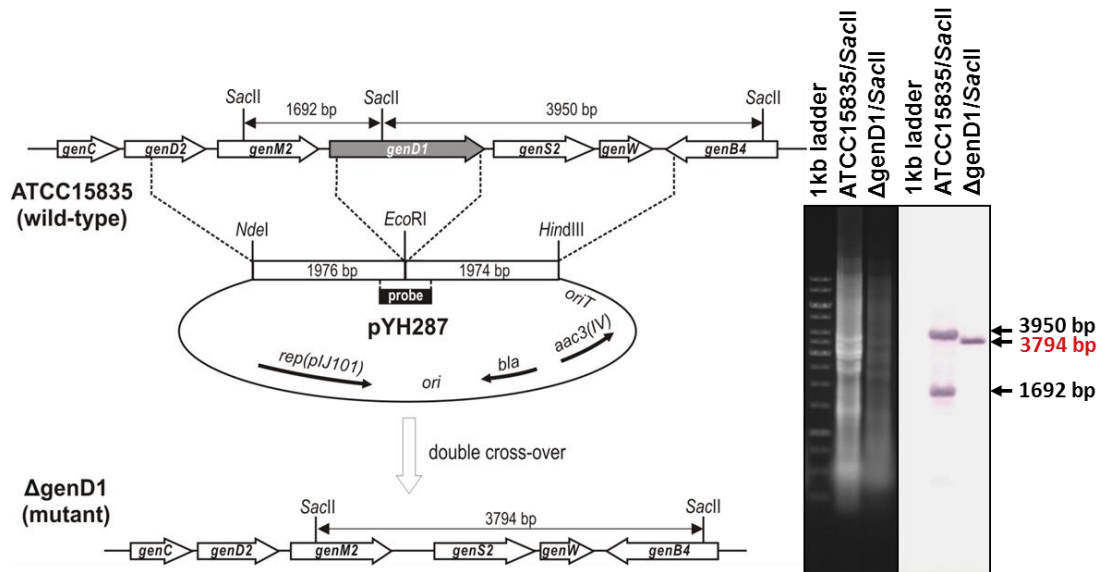

**G**  $\Delta$ genD2::genD2

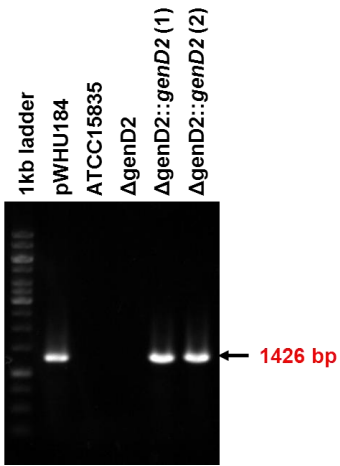

**H**  $\Delta$ genS2::genS2

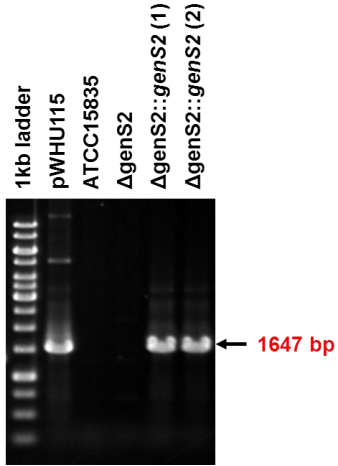

**I**  $\Delta$ genN::genN

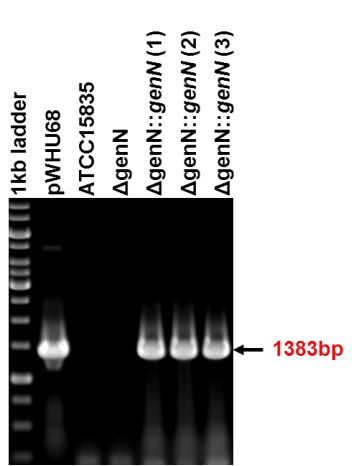

**J**  $\Delta$ genD1::genD1

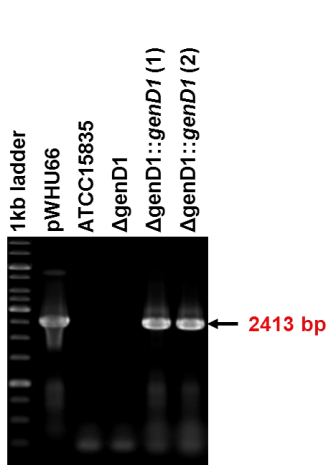

**K**  $\Delta$ genD2 $\Delta$ genK::genK

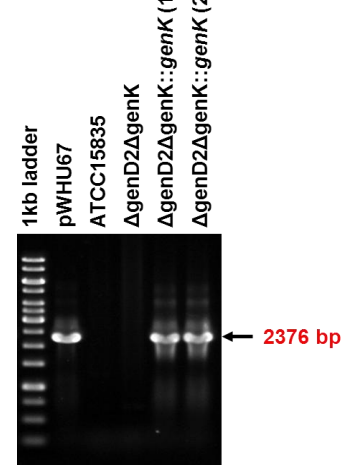

**L**  $\Delta$ genS2 $\Delta$ genK::genK

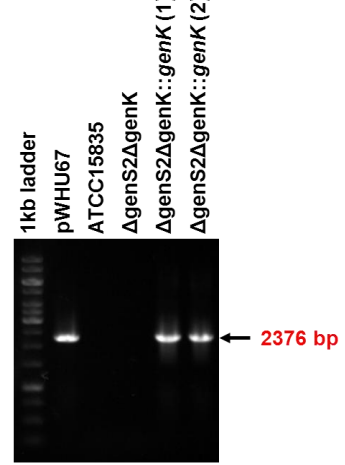

**Figure S2. MS and MS/MS spectra of gentamicin-related intermediates isolated from mutants of *M. echinospora*.** Related to Figure 2.

Selective ion monitoring on (A)  $[M+H]^+$  ( $m/z$  456.2188) ion of gentamicin A2 (**3**); (B)  $[M+H]^+$  ( $m/z$  470.2344) ion of gentamicin A2e (**7**); (C)  $[M+H]^+$  ( $m/z$  455.23478) ion of 3''-dehydro-3''-amino-gentamicin A2 (DAA2, [**9**]); (D)  $[M+H]^+$  ( $m/z$  469.2504) ion of gentamicin A (**6**); (E)  $[M+H]^+$  ( $m/z$  483.2661) ion of gentamicin Ae (**10**)

**A**

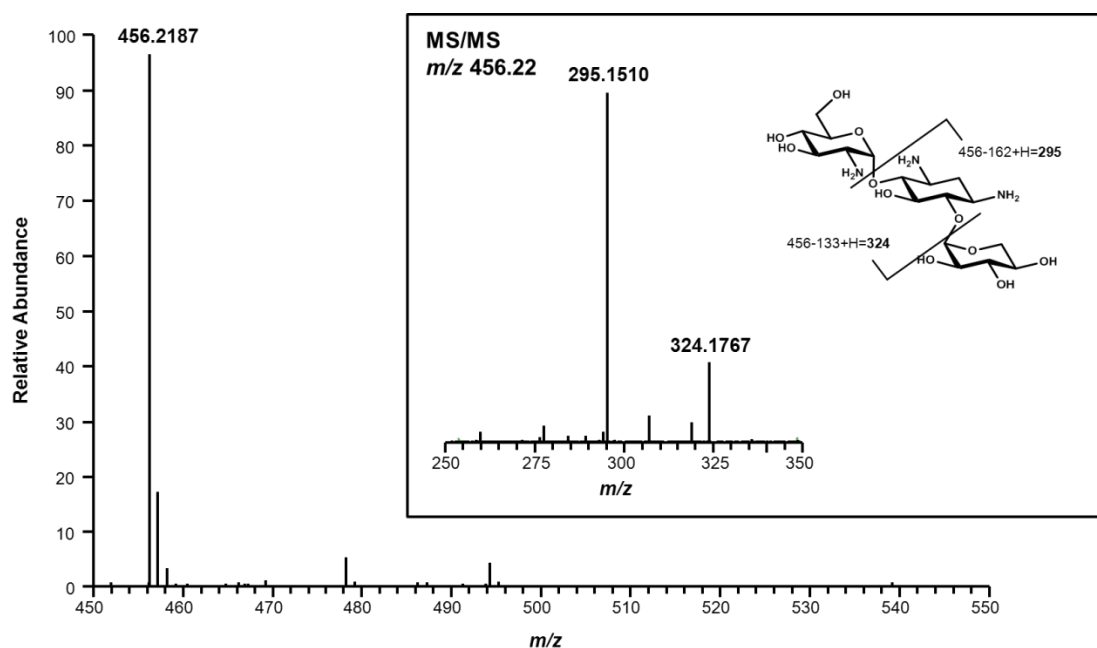

**B**

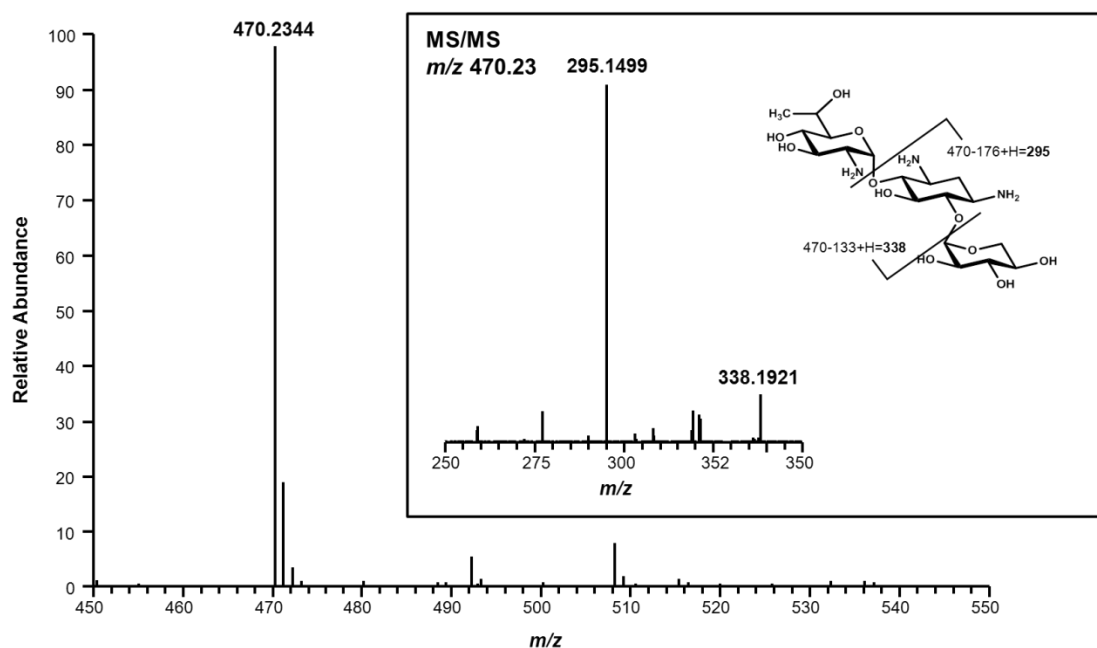



**C**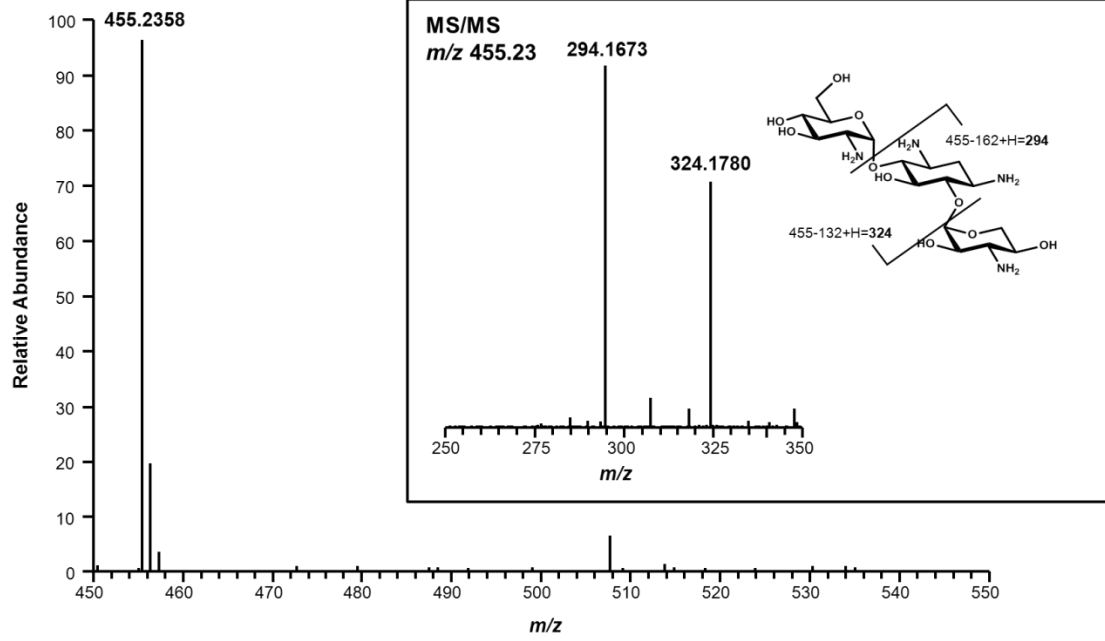**D**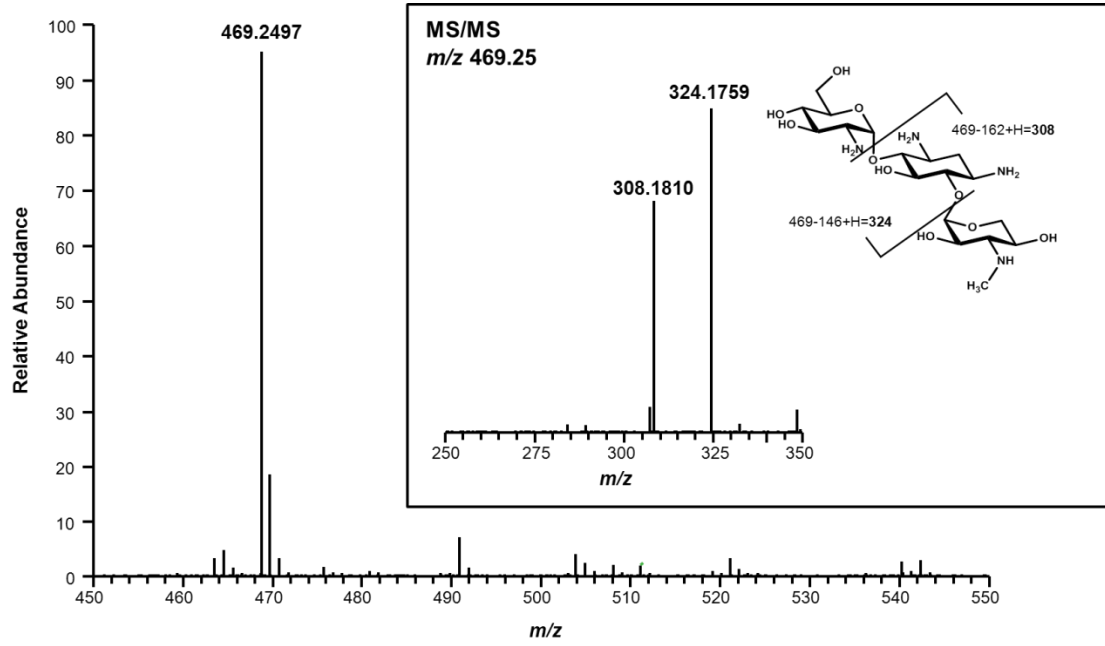

**F**

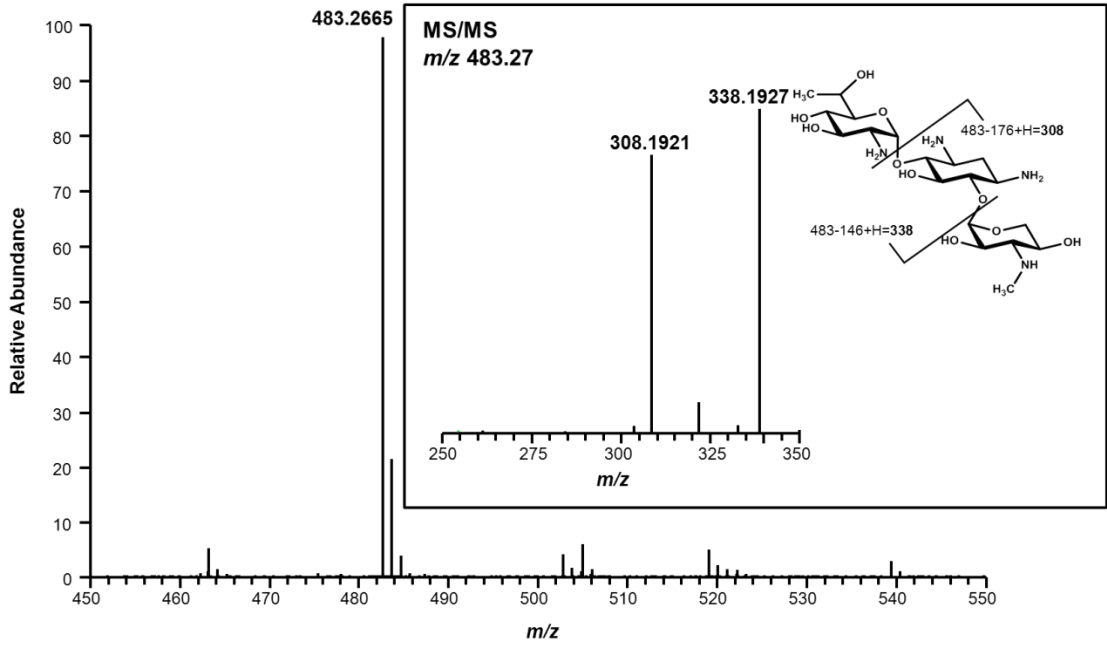

**Figure S3. LC-ESI-HRMS analysis of the production of the gentamicin C complex and gentamicin-related metabolites by *Micromonospora echinospora* mutants when fed with gentamicin A or G418. Related to Figure 2.**

Total ion current trace of (A) gentamicin standard; and fermentation culture extracts from (B) wild-type; (C)  $\Delta$ genD2 mutant fed with gentamicin A; (D)  $\Delta$ genS2 mutant fed with gentamicin A; (E)  $\Delta$ genN mutant fed with gentamicin A; (F)  $\Delta$ genD1 mutant fed with gentamicin A; (G)  $\Delta$ genD1 mutant fed with G418 (5).

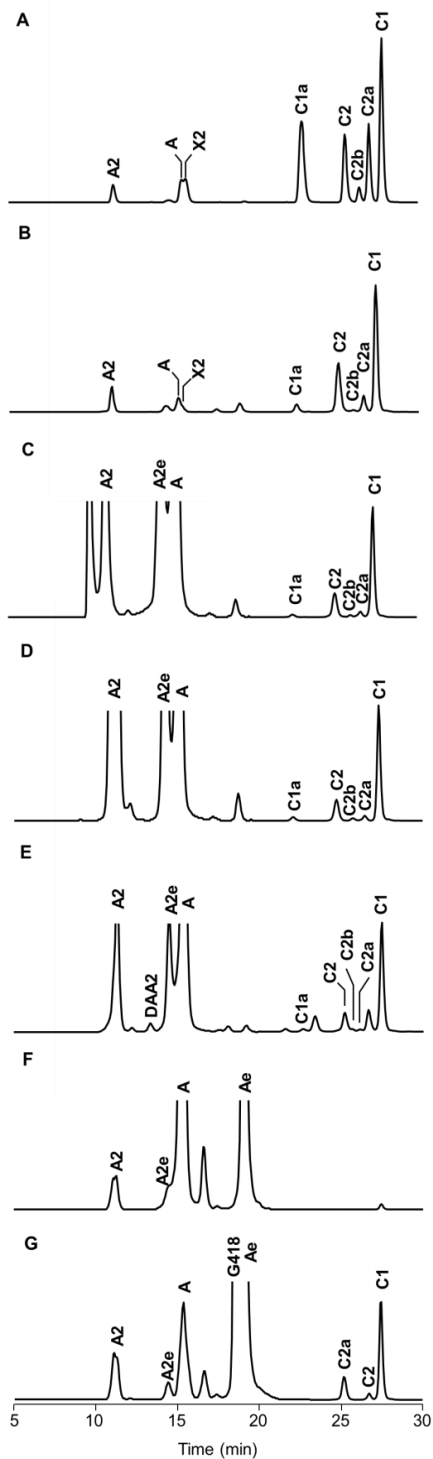

**Figure S4. Characterization of purified recombinant GenD2, GenS2, GenN and GenD1.** Related to Figure 3 and 4.

(A) SDS-PAGE gel of GenD2, GenS2, GenN and GenD1; (B) UV-visible absorption spectra of GenD2, GenS2 and GenD1.

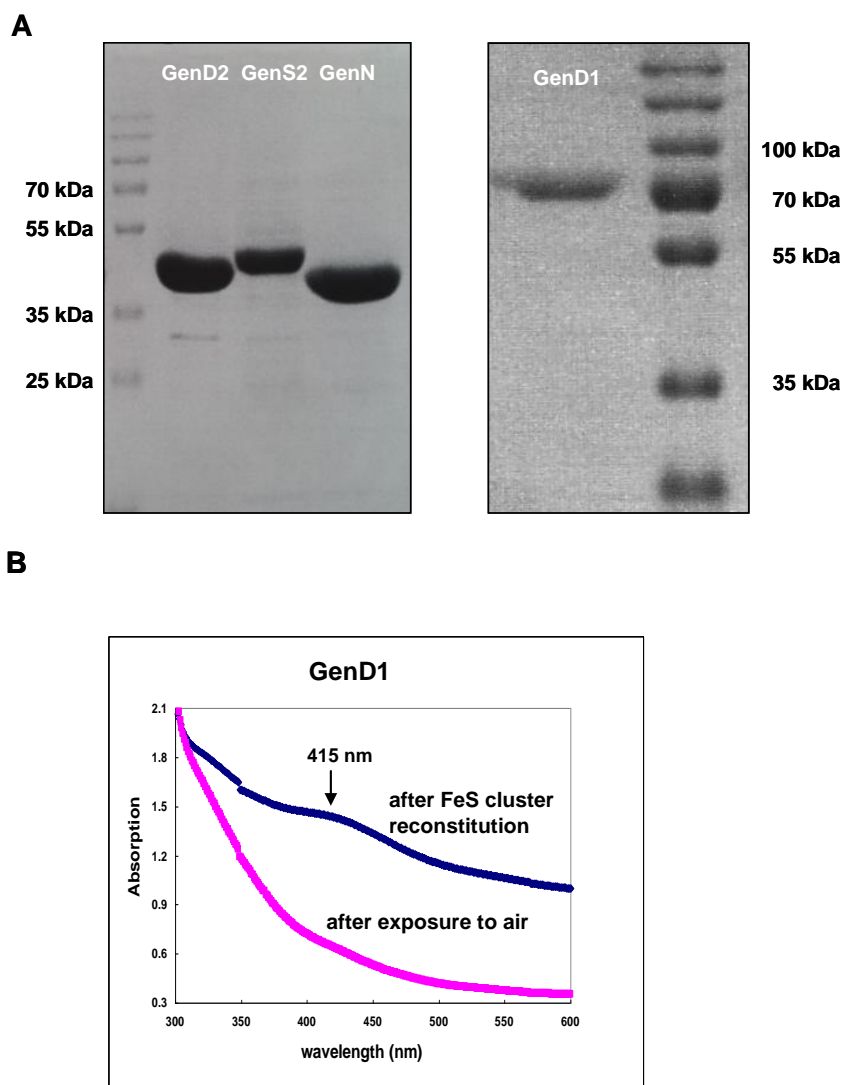

**Figure S5. LC-ESI-HRMS analysis of GenD2-, GenS2- and GenN-catalyzed modifications on kanamycin B and tobramycin.** Related to Figure 3.

Selective ion monitoring was carried out on

(A)  $[M+H]^+$  ( $m/z$  484) and  $[M+Na]^+$  ( $m/z$  506) ions of kanamycin B (**11**);

(B)  $[M+H]^+$  ( $m/z$  483) and  $[M+Na]^+$  ( $m/z$  505) ions of 3''-deamino-3''-oxo-kanamycin B (**13**), the product of GenS2 catalyzed de-amination of **11**;

(C)  $[M+H]^+$  ( $m/z$  485) and  $[M+Na]^+$  ( $m/z$  507) ions of 3''-deamino-3''-hydroxy-kanamycin B (**15**), the product of GenD2 catalyzed hydrogenation of **13**;

(D)  $[M+H]^+$  ( $m/z$  498) and  $[M+Na]^+$  ( $m/z$  520) ions of 3''N-methyl-kanamycin B (**17**), the product of GenN catalyzed methylation of **11**.

(E)  $[M+H]^+$  ( $m/z$  468) and  $[M+Na]^+$  ( $m/z$  490) ions of tobramycin (**12**);  
 (F)  $[M+H]^+$  ( $m/z$  467) and  $[M+Na]^+$  ( $m/z$  489) ions of 3''-deamino-3''-oxo-tobramycin (**14**), the product of GenS2 catalyzed de-amination of **12**;  
 (G)  $[M+H]^+$  ( $m/z$  469) and  $[M+Na]^+$  ( $m/z$  491) ions of 3''-deamino-3''-hydroxy-tobramycin (**16**), the product of GenD2 catalyzed hydrogenation of **14**;  
 (H)  $[M+H]^+$  ( $m/z$  482) and  $[M+Na]^+$  ( $m/z$  504) ions of 3''N-methyl-tobramycin (**18**), the product of GenN catalyzed methylation of **12**.  
 MS/MS analysis of  $[M+H]^+$  ( $m/z$  484),  $[M+H]^+$  ( $m/z$  483),  $[M+H]^+$  ( $m/z$  485),  $[M+H]^+$  ( $m/z$  498) MS<sup>2</sup> analysis of  $[M+H]^+$  ( $m/z$  468),  $[M+H]^+$  ( $m/z$  467),  $[M+H]^+$  ( $m/z$  485) and  $[M+H]^+$  ( $m/z$  482) ions are also shown.

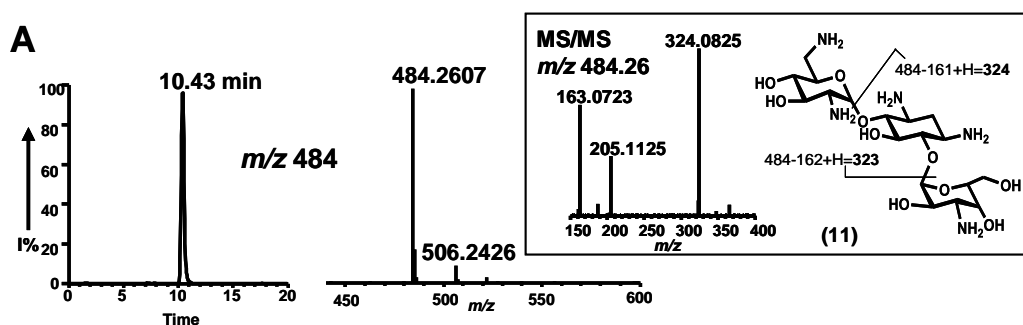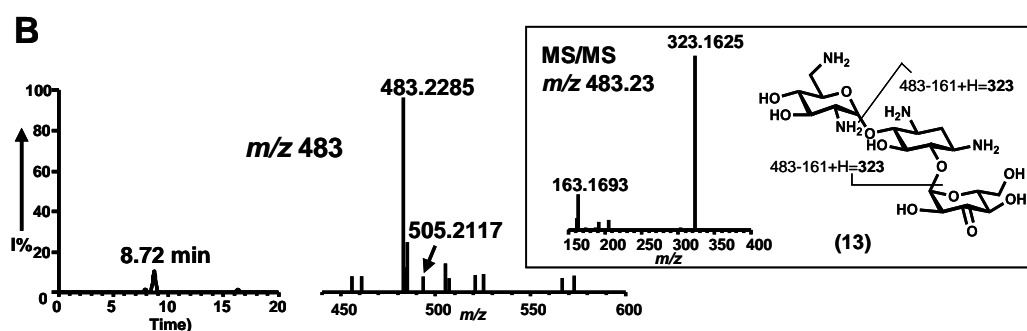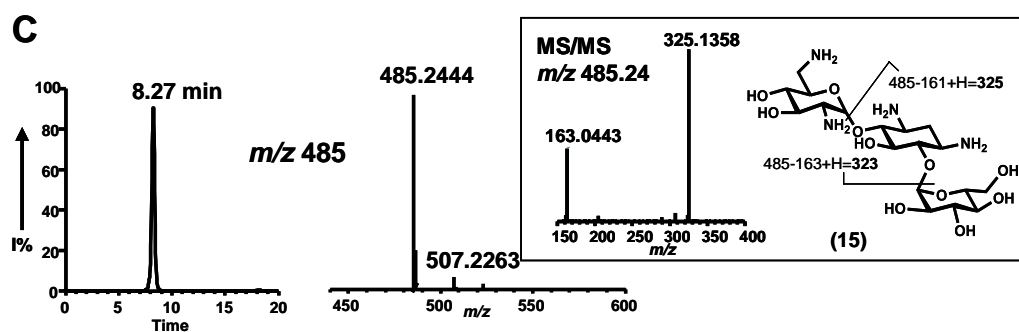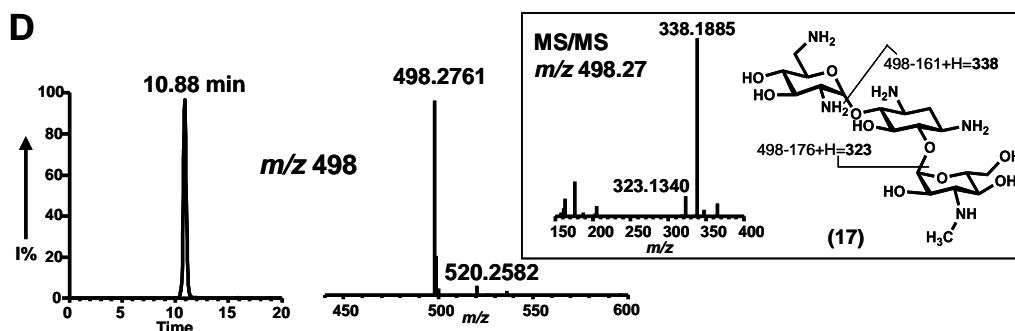

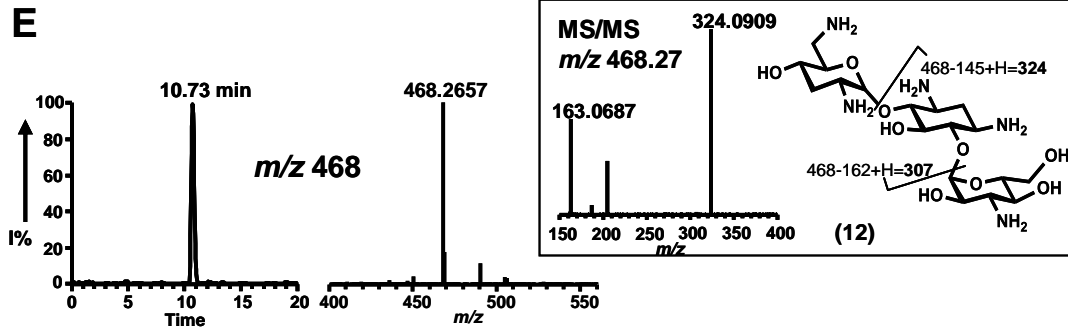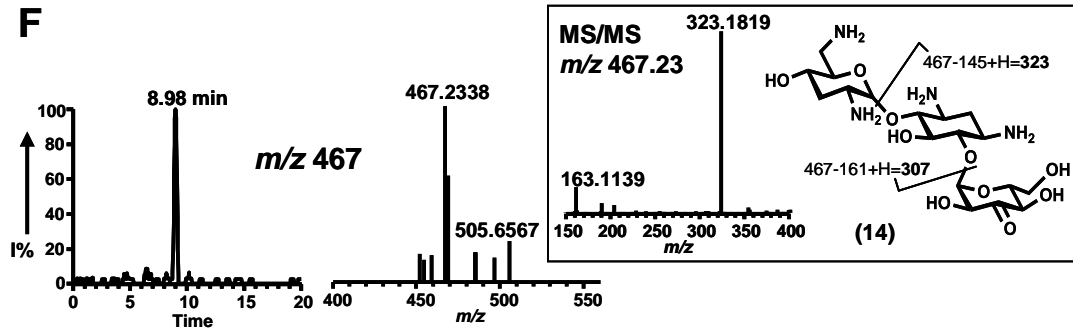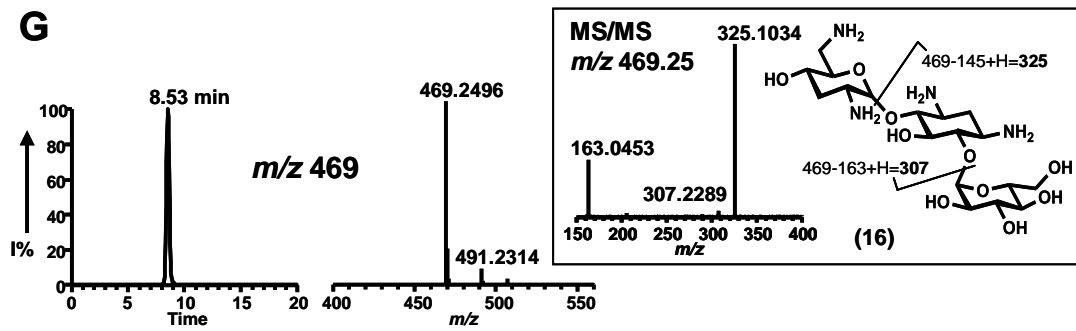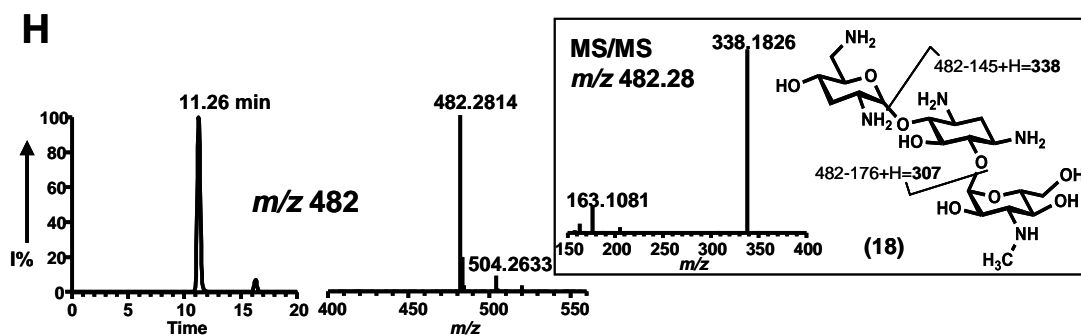

## Supplemental Experimental Procedures

### 1. List of oligonucleotide primers used in this work

| Primer    | Oligonucleotide sequences (5' to 3') | Restriction Site |
|-----------|--------------------------------------|------------------|
| genD2-L1  | CGC <b>CATATG</b> AGAGATGGAAGTGGC    | <i>NdeI</i>      |
| genD2-L2  | CCG <b>GAATTC</b> CACTCGGGGATC       | <i>EcoRI</i>     |
| genD2-R1  | GTG <b>GAATTC</b> AATGCCTGACAACAAG   | <i>EcoRI</i>     |
| genD2-R2  | CAG <b>AAGCTT</b> CTCGCCCTCCCG       | <i>HindIII</i>   |
| genD2-CK1 | GCTGCGGTTCGACAACAAGC                 |                  |
| genD2-CK2 | TTGGACGGGATCGGCAGCAC                 |                  |
| genS2-L1  | CGT <b>CATATG</b> TGTCGCATTCCCACCG   | <i>NdeI</i>      |
| genS2-L2  | GGC <b>GAATTC</b> CTGGTGCATGGTGTTC   | <i>EcoRI</i>     |
| genS2-R1  | GAG <b>GAATTC</b> CAGGACATGCTGGATG   | <i>EcoRI</i>     |
| genS2-R2  | CTG <b>AAGCTT</b> TACAACATCGGCCAGG   | <i>HindIII</i>   |
| genS2-CK1 | TGGAGAACTACTGGGTGAAGCA               |                  |
| genS2-CK2 | TCGACCGTGACCTTGAGGAA                 |                  |
| genD2-a   | CACGG <b>CATATG</b> CTGCCGATGG       | <i>NdeI</i>      |
| genD2-b   | GGGG <b>GAATTC</b> TTGTCAGGCATTCAT   | <i>EcoRI</i>     |
| genS2-a   | CCG <b>CATATG</b> ACGCAGAACTGGCCA    | <i>NdeI</i>      |
| genS2-b   | GCC <b>GAATTC</b> GATCATAGGCTCTTC    | <i>EcoRI</i>     |
| genK-CK1  | CGGGCGAACCTTCGGGATA                  |                  |
| genK-CK2  | CCGTCAGCGTTGGCAATAA                  |                  |
| genD1-L1  | GGC <b>CATATG</b> GCTCGCGGCCG        | <i>NdeI</i>      |
| genD1-L2  | AAG <b>GAATTC</b> CGTGAGGGTCCACC     | <i>EcoRI</i>     |
| genD1-R1  | CCG <b>GAATTC</b> GCCCTCGGGGC        | <i>EcoRI</i>     |
| genD1-R2  | GTG <b>AAGCTT</b> GATCGGCCGACATCG    | <i>HindIII</i>   |
| genD1-CK1 | GAAGCTCGCCGATGCCA                    |                  |
| genD1-CK2 | CAGGTGAAGCGGTGGTG                    |                  |
| genD1-a   | CGC <b>CATATG</b> ACCGTCACTAACAAG    | <i>NdeI</i>      |
| genD1-b   | CCG <b>GAATTC</b> TCAGCGGCTACCTGCCCC | <i>EcoRI</i>     |

|            |                                          |                |
|------------|------------------------------------------|----------------|
| genN-L1    | GCG <u>CATATG</u> CTCGTAGACCCAGTTC       | <i>NdeI</i>    |
| genN-L2    | CTG <u>GAATTC</u> CGAGCCTCCGACGATC       | <i>EcoRI</i>   |
| genN-R1    | GAC <u>GAATTC</u> CTGCGGGGCTGACCCC       | <i>EcoRI</i>   |
| genN-R2    | GAG <u>AAGCTT</u> GCCGCGACTCCGACC        | <i>HindIII</i> |
| genN-CK1   | GGATGGGATGCCAACGACC                      |                |
| genN-CK2   | ACCGCGACGACGATGACG                       |                |
| genN-a     | CGC <u>CATATG</u> ATCGTCGGAGGCTCG        | <i>NdeI</i>    |
| genN-b     | CCG <u>GAATTC</u> CTAGCCCCGATGAGCCG      | <i>EcoRI</i>   |
| pGenD1-For | GGAGTCCT <u>CATATG</u> ACCGTCACTAACAAGA  | <i>NdeI</i>    |
| pGenD1-Rev | 5GGCCAGGGCC <u>GGATCC</u> GGACGGGGTCGCCA | <i>BamHI</i>   |
| pGenD2-For | GTGGGTGCTG <u>CATATG</u> GTTG AGCGCCTGGG | <i>NdeI</i>    |
| pGenD2-Rev | CCCAACACGT <u>GAATTC</u> CGCCCATCGGGTCG  | <i>EcoRI</i>   |
| pGenN-For  | ACTCTCGGGAGTAG <u>CATATG</u> ATCGTCGGAG  | <i>NdeI</i>    |
| pGenN-Rev  | GGTGCGGT <u>GGATCC</u> AACCTG TGGCAGGGCC | <i>BamHI</i>   |
| pGenS2-For | GGCAG GTAGCCG <u>CATATG</u> ACGCAGAACTG  | <i>NdeI</i>    |
| pGenS2-Rev | TCGCCGATCGG <u>GAATTC</u> TTCGAGGGATCGG  | <i>EcoRI</i>   |

Primer pairs for amplification of left- or right-flanking fragments of a target gene, for PCR/sequencing confirmation, for complementation plasmid construction, and for cloning target genes for over-expression are marked with suffixes –L1/–L2, -R1/-R2, –a/-b, CK1/CK2, or –For/-Rev, respectively.

## 2. List of bacterial strains and plasmids used in this study

| Strain/Plasmid                           | Characteristics                                                            | Reference                |
|------------------------------------------|----------------------------------------------------------------------------|--------------------------|
| <b><i>E.coli</i></b>                     |                                                                            |                          |
| DH10B                                    | Host for general cloning                                                   | Invitrogen               |
| NovaBlue                                 | Host for general cloning                                                   | Novagen                  |
| BL21(DE3)                                | Host for recombinant protein expression                                    | Novagen                  |
| ET12567/pUZ8002                          | Donor strain for conjugation between <i>E.coli</i> and <i>Streptomyces</i> | MacNeil et al., (1992)   |
| <b><i>Micromonospora echinospora</i></b> |                                                                            |                          |
| ATCC15835                                | Gentamicin producing wild-type strain                                      | Weinstein et al., (1963) |



---

|                                            |                                                                              |                    |
|--------------------------------------------|------------------------------------------------------------------------------|--------------------|
| $\Delta$ genD2                             | <i>genD2</i> single in-frame deletion mutant                                 | This work          |
| $\Delta$ genS2                             | <i>genS2</i> single in-frame deletion mutant                                 | This work          |
| $\Delta$ genD2 $\Delta$ genK               | <i>genD2</i> and <i>genK</i> in-frame deletion mutant                        | This work          |
| $\Delta$ genS2 $\Delta$ genK               | <i>genS2</i> and <i>genK</i> in-frame deletion mutant                        | This work          |
| $\Delta$ genD2:: <i>genD2</i>              | Self-complementation of <i>genD2</i> in $\Delta$ genD2                       | This work          |
| $\Delta$ genD1:: <i>genD1</i>              | Self-complementation of <i>genD1</i> in $\Delta$ genD1                       | This work          |
| $\Delta$ genS2:: <i>genS2</i>              | Self-complementation of <i>genS2</i> in $\Delta$ genS2                       | This work          |
| $\Delta$ genN:: <i>genN</i>                | Self-complementation of <i>genN</i> in $\Delta$ genN                         | This work          |
| $\Delta$ genD2 $\Delta$ genK:: <i>genK</i> | Self-complementation of <i>genK</i> in $\Delta$ genD2 $\Delta$ genK          | This work          |
| $\Delta$ genS2 $\Delta$ genK:: <i>genK</i> | Self-complementation of <i>genK</i> in $\Delta$ genS2 $\Delta$ genK          | This work          |
| <b>Plasmid</b>                             |                                                                              |                    |
| pUC18                                      | Vector for sub-cloning and DNA sequencing                                    | Takara             |
| pYH7                                       | <i>E. coli-Streptomyces</i> shuttle vector                                   | Sun et al., (2009) |
| pWHU1                                      | <i>genK</i> in-frame deletion construct                                      | Guo et al. (2014)  |
| pWHU6                                      | <i>genD2</i> in-frame deletion construct                                     | This work          |
| pWHU21                                     | <i>genS2</i> in-frame deletion construct                                     | This work          |
| pYH287                                     | <i>genD1</i> in-frame deletion construct                                     | This work          |
| pYH289                                     | <i>genN</i> in-frame deletion construct                                      | This work          |
| pWHU67                                     | <i>genK</i> self-complementation construct                                   | Guo et al., (2014) |
| pWHU115                                    | <i>genS2</i> self-complementation construct                                  | This work          |
| pWHU184                                    | <i>genD2</i> self-complementation construct                                  | This work          |
| pWHU66                                     | <i>genD1</i> self-complementation construct                                  | This work          |
| pWHU68                                     | <i>genN</i> self-complementation construct                                   | This work          |
| pET28/genD2                                | for over-expression of recombinant GenD2                                     | This study         |
| pET28/genS2                                | for over-expression of recombinant GenS2                                     | This study         |
| pET28/genN                                 | for over-expression of recombinant GenN                                      | This study         |
| pET28/genD1                                | for over-expression of recombinant GenD1                                     | This study         |
| pDB1282                                    | for over-expression of iron-sulfur cluster ( <i>isc</i> ) biosynthetic genes | Zheng et al., 1998 |

---

### 3. Structures of 3''-dehydro-3''-amino-gentamicin A2 and its homologs, kanamycin B, tobramycin and sisomicin.

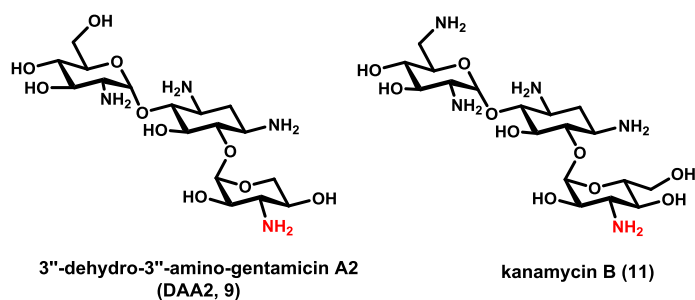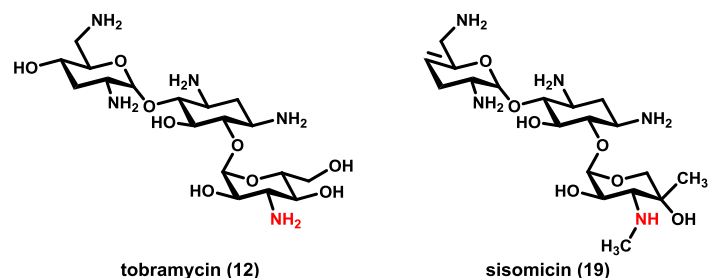

### 4. Purification of gentamicin A2

Purification of gentamicin A2 (**3**) from extracts of the  $\Delta$ genS2 $\Delta$ genK mutant fermentation broth after cation exchange (see Experimental Procedures) was performed on a Waters 2535 semi-preparative HPLC system using a ZORBAX SB-C18 (9.4  $\times$  250 mm, 5 $\mu$ , Agilent) semi-preparative column, with as mobile phase (A) 0.2% TFA in water adjusted to pH 2 with  $\text{NH}_4\text{OH}$  and (B) acetonitrile. Elution of gentamicin A2 was carried out isocratically at 95% A for 15 min at a flow rate of 4 ml/min. The column eluate was directed to an Evaporative Light Scattering Detector (ELSD, Alltech 3300) with 2ml/min splitting, and the rest of the eluate was collected in 1 ml fractions. The atomization temperature of ELSD was 55 $^\circ\text{C}$  and the drift tube temperature was 48  $^\circ\text{C}$ . Fractions containing gentamicin A2 were pooled and further confirmed by LC-ESI-HRMS.

### 5. Kinetic study of GenN with kanamycin B

8.5 nM GenN was incubated in 500  $\mu\text{l}$  Tris-HCl (50 mM, pH 7.5) buffer at 30 $^\circ\text{C}$  with kanamycin B (**11**) at concentrations of 30, 40, 50, 60 and 70  $\mu\text{M}$  in the presence of 250  $\mu\text{M}$  SAM. An 80  $\mu\text{l}$  aliquot of each reaction was taken out after 1, 2, 3, 4, 5 and 6 min incubation and mixed immediately with an equal volume of ice cold chloroform to precipitate the enzyme. The reactions were analyzed by LC-ESI-MS. The product 3''-N-methylkanamycin B (**17**) was quantified

based on the peak integration of the selected ion. Data points are the mean value of three replicates.

## **6. Conditions for LC-ESI-MS analyses**

LC-ESI-HRMS analysis of gentamicin-related metabolites and in vitro assays were performed on a Thermo LTQ-Orbitrap XL instrument using a Luna C18 column (250 mm × 4.6 mm, 5 μ, Phenomenex) with a flow rate of 0.4 ml/min. LC-MS analysis of proteins was carried out on a ThermoFinnigan LCQ fitted with an ESI source connected to an Agilent HP 1100 HPLC system using a Nucleosil C4 column (250 mm × 2 mm, 5 μ, Macherey-Nagel). The mobile phase and gradients used for HPLC are as follows:

### **HPLC gradient used for analysis of gentamicin-related metabolites**

Mobile phase A: 0.2% TFA in water; Mobile phase B: acetonitrile. 2% B to 14% B over 18 min, then to 90 % B within 1 min, maintained at 90% B for 5 min, returned to 2% B over 1 min and maintained at 2% B for a further 5 min. The injection volume was 5 μl for each gentamicin standard (500 μg ml<sup>-1</sup>) and 20 μl for each sample. Each cultivation and analysis was performed in triplicate.

### **HPLC gradient for analysis of aminoglycosides in enzymatic assays**

Mobile phase A: 0.2% TFA in water; Mobile phase B: 0.1% TFA in acetonitrile. 2%B to 8%B over 9 min then to 90%B over 1 min, maintained at 90%B for 4 min, returned to 2%B over 1 min and then maintained at 2%B for a further 5 min. flow rate 0.6 ml/min.

### **HPLC gradient for analysis of 5'-deoxyadenosine in enzymatic assays**

Mobile phase A: 0.1% TFA in water; Mobile phase B: 0.1% TFA in acetonitrile. 0%B to 20% B over 30 min. 0.6 ml/min.

### **HPLC gradient for analysis of proteins**

Mobile phase A: 0.1% TFA in water; Mobile phase B: 0.1% TFA in acetonitrile. 35% B to 45 % B over 5 min, increasing gradient of B to 75% over 20 min, gradient to 95% within 2 min, maintained at 95% B for 7 min, followed by a gradient from 95% B to 35%B within 3 min;

## **References**

1. Kim J.Y., Suh J.W., Kang S.H., Phan T.H., Park S.H., Kwon H.J.(2008). Gene inactivation study of gntE reveals its role in the first step of pseudotrisaccharide modifications in gentamicin biosynthesis. *Biochem. Biophys. Res. Commun.* 372, 730-734.
2. MacNeil, D.J., Occi, J.L., Gewain, K.M., MacNeil, T., Gibbons, P.H., Ruby, C.L., and Danis, S.J. (1992). Complex organization of the *Streptomyces avermitilis* genes encoding the avermectin polyketide synthase. *Gene* 115,

119-125.

3. Weinstein, M.J., Luedemann, G.M., Oden, E.M., Wagman, G.H., Rosselet, J.P., Marquez, J.A., Coniglio, C.T., Charney, W., Herzog, H.L., and Black, J (1963). Gentamicin, a new antibiotic complex from *Micromonospora*. J. Med. Chem. 6, 463-464.

4. Sun, Y., He, X., Liang, J., Zhou X., and Deng, Z. (2009). Analysis of functions in plasmid pHZ1358 influencing its genetic and structural stability in *Streptomyces lividans* 1326. Appl. Microbiol. Biotechnol. 82, 303-310.

5. Guo, J., Huang, F., Huang, C., Duan, X., Jian, X., Leeper, F., Deng, Z., and Leadlay, P.F., Sun, Y. (2014). Specificity and promiscuity at the branch point in gentamicin biosynthesis. Chem Biol. 21, 608-618.
